# Supplementary material
Source: PubMed Central journal article supplement (PMC7228811)
Supplement: NIHMS1577813-supplement-Supplementary_Material.pdf [file NIHMS1577813-supplement-Supplementary_Material.pdf]

## Supplementary tables

**Supp. Table 1. Overall statistical power of the study for each analyzed *TYK2* genetic variant accordingly with global disease.**

| Significance level | OR=1.2      |                    | OR=1.3      |                    | OR=1.4 |                    | OR=1.5      |                    |
|--------------------|-------------|--------------------|-------------|--------------------|--------|--------------------|-------------|--------------------|
|                    | 0.05        | 5x10 <sup>-8</sup> | 0.05        | 5x10 <sup>-8</sup> | 0.05   | 5x10 <sup>-8</sup> | 0.05        | 5x10 <sup>-8</sup> |
| <b>rs2304256</b>   | <b>1.00</b> | <b>0.98</b>        | 1.00        | 1.00               | 1.00   | 1.00               | 1.00        | 1.00               |
| <b>rs34536443</b>  | <b>0.76</b> | <b>0.01</b>        | <b>0.97</b> | <b>0.08</b>        | 1.00   | 0.42               | 1.00        | 0.84               |
| <b>rs35018800</b>  | 0.34        | 0.01               | 0.62        | 0.01               | 0.83   | 0.01               | <b>0.94</b> | <b>0.03</b>        |
| <b>rs12720356</b>  | <b>0.99</b> | <b>0.24</b>        | 1.00        | 0.93               | 1.00   | 1.00               | 1.00        | 1.00               |

OR, odds ratio.

**Supp. Table 2. Inverse variance meta-analysis of four *TYK2* SNPs in the validation cohort (4,985 SSc patients and 7,478 controls).**

| Chr | SNP                    | Minor/<br>Major | Comment               | MAF<br>Cases | MAF<br>Controls | Inverse variance test |                  |      |
|-----|------------------------|-----------------|-----------------------|--------------|-----------------|-----------------------|------------------|------|
|     |                        |                 |                       |              |                 | <i>P</i> -value       | OR [CI 95%]*     | Q    |
| 19  | rs34536443<br>(P1104A) | C/G             | missense<br>Pro > Ala | 0.026        | 0.029           | 0.019                 | 0.82 [0.70-0.97] | 0.06 |
| 19  | rs35018800<br>(A928V)  | A/G             | missense<br>Ala > Val | 0.004        | 0.008           | 6.00E-03              | 0.57 [0.38-0.85] | 0.19 |
| 19  | rs12720356<br>(I684S)  | C/A             | missense<br>Ile > Ser | 0.068        | 0.078           | 9.54E-05              | 0.81 [0.73-0.90] | 0.59 |
| 19  | rs2304256<br>(V362F)   | A/C             | missense<br>Val > Phe | 0.250        | 0.283           | 2.26E-10              | 0.82 [0.77-0.87] | 0.58 |

\*Odds ratio for the minor allele.

Chr, chromosome; CI, confidence interval; MAF, minor allele frequency; OR, odds ratio; Q heterogeneity value; SNP, single nucleotide polymorphism; SSc, systemic sclerosis.

**Supp. Table 3. Allelic combination analysis of 4 *TYK2* SNPs in the overall combined cohort.**

| <b>Chr</b> | <b>From bp</b> | <b>To bp</b> | <b>Allelic<br/>Combination</b> | <b>Frequency</b> | <b>P-value</b> | <b>OR</b> |
|------------|----------------|--------------|--------------------------------|------------------|----------------|-----------|
| 19         | 10463118       | 10475652     | GGCA                           | 0.074            | 1.24E-06       | 0.81      |
| 19         | 10463118       | 10475652     | GAAA                           | 0.006            | 1.45E-04       | 0.54      |
| 19         | 10463118       | 10475652     | CGAA                           | 0.024            | 6.35E-06       | 0.70      |
| 19         | 10463118       | 10475652     | GGAA                           | 0.162            | 0.014          | 0.93      |
| 19         | 10463118       | 10475652     | GGAC                           | 0.730            | 5.95E-12       | 1.19      |

\*SNP order of the allelic combination: rs34536443, rs35018800, rs12720356 and rs2304256. Minor allele is highlighted in red.

Bp: base-pair ; Chr, chromosome; OR, odds ratio.
